# Supplementary material for: Strengthening of enterococcal biofilms by Esp
Source: PLOS journal article supplement (doi:10.1371/journal.ppat.1010829), 2022-09-14

S4 Figure

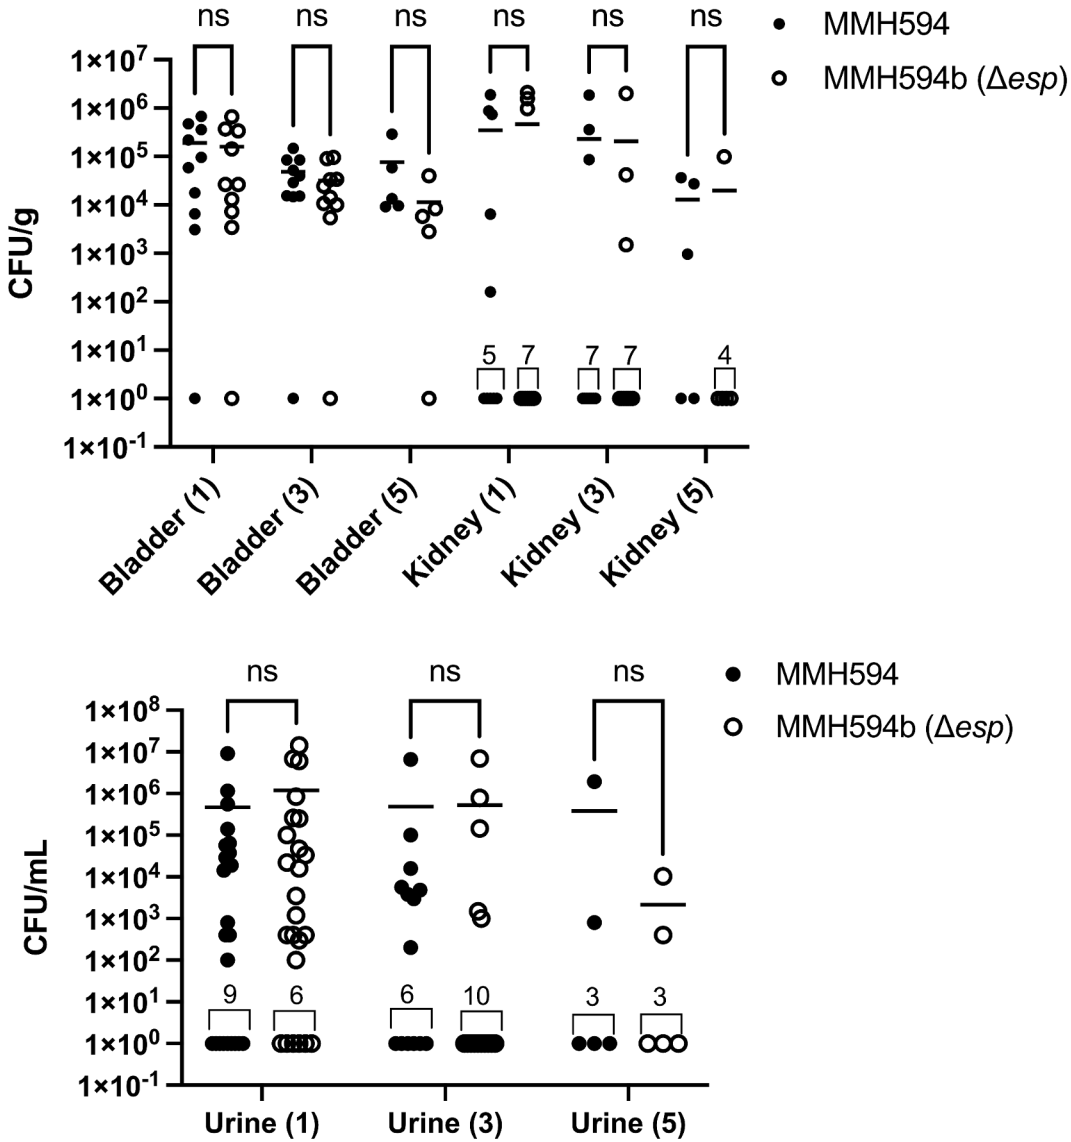

Supplement: S4 (10.1371/journal.ppat.1010829.s004) [file journal.ppat.1010829.s004]
