# Supplementary material for: Strengthening of enterococcal biofilms by Esp
Source: PLOS journal article supplement (doi:10.1371/journal.ppat.1010829), 2022-09-14

S15 Figure

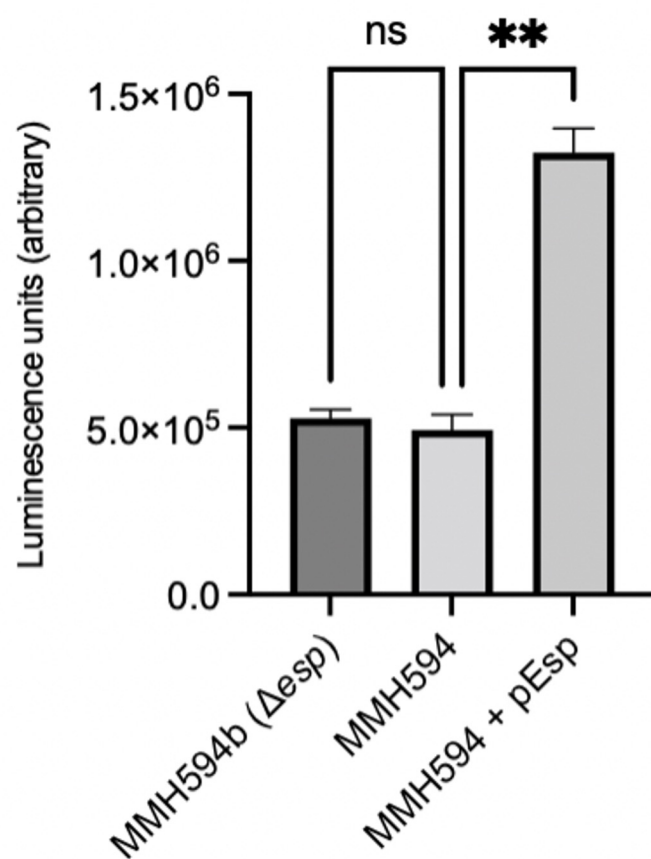

Supplement: S15 (10.1371/journal.ppat.1010829.s015) [file journal.ppat.1010829.s015]
